# Supplementary material for: Impact of Underweight after Treatment on Prognosis of Advanced-Stage Ovarian Cancer
Source: Hindawi journal article supplement (doi:10.1155/2014/349546), 2014-01-01
Supplement: f1 [file 349546.f1.pdf]

Supplementary Table 1. Clinico-pathologic characteristics of 360 patients with advanced-stage ovarian cancer

| Characteristics                 | No. of Patients (%) |
|---------------------------------|---------------------|
| Age (y)                         |                     |
| <53                             | 170 (47.2)          |
| ≥53                             | 190 (52.8)          |
| FIGO stage                      |                     |
| III                             | 284 (78.9)          |
| IV                              | 76 (21.1)           |
| Histology                       |                     |
| Serous                          | 276 (76.7)          |
| Non-serous                      | 84 (23.3)           |
| Grade                           |                     |
| 1                               | 10 (2.8)            |
| 2                               | 59 (16.4)           |
| 3                               | 181 (50.3)          |
| Unknown                         | 110 (30.6)          |
| Residual tumor (cm)             |                     |
| ≥1                              | 173 (48.1)          |
| <1                              | 187 (51.9)          |
| Cycles of adjuvant chemotherapy |                     |
| ≤6                              | 224 (62.2)          |
| >6                              | 136 (37.8)          |

FIGO, International Federation of Gynecology and Obstetrics.

Supplementary Table 2. Clinico-pathologic characteristics of 29 underweight patients after treatment according to the degree of weight loss

| Characteristics          | Weight loss $\geq 10\%$<br>(n=11, %) | Weight loss $< 10\%$<br>(n=18, %) | P value |
|--------------------------|--------------------------------------|-----------------------------------|---------|
| Age (y)                  |                                      |                                   | 0.70    |
| <53                      | 7 (63.6)                             | 9 (50)                            |         |
| $\geq 53$                | 4 (36.4)                             | 9 (50)                            |         |
| FIGO stage               |                                      |                                   | 0.62    |
| III                      | 10 (90.9)                            | 14 (77.8)                         |         |
| IV                       | 1 (9.1)                              | 4 (22.2)                          |         |
| Histology                |                                      |                                   | 0.17    |
| Serous                   | 7 (63.6)                             | 15 (83.3)                         |         |
| Non-serous               | 4 (36.4)                             | 3 (16.7)                          |         |
| Grade                    |                                      |                                   | 1.00    |
| 1                        | 0 (0)                                | 0 (0)                             |         |
| 2                        | 3 (27.2)                             | 5 (27.8)                          |         |
| 3                        | 4 (36.4)                             | 9 (50)                            |         |
| Unknown                  | 4 (36.4)                             | 4 (22.2)                          |         |
| Residual tumor (cm)      |                                      |                                   | 0.02    |
| $\geq 1$                 | 7 (63.6)                             | 3 (16.7)                          |         |
| $< 1$                    | 4 (36.4)                             | 15 (83.3)                         |         |
| Neoadjuvant chemotherapy |                                      |                                   | 1.00    |
| No                       | 9 (81.8)                             | 15 (83.3)                         |         |
| Yes                      | 2 (18.2)                             | 3 (16.7)                          |         |

-Supplementary Table 2 continued

| Characteristics                 | Weight loss $\geq 10\%$<br>(n=11, %) | Weight loss $< 10\%$<br>(n=18, %) | P value |
|---------------------------------|--------------------------------------|-----------------------------------|---------|
| Cycles of adjuvant chemotherapy |                                      |                                   | 0.36    |
| $\leq 6$                        | 10 (90.9)                            | 13 (72.2)                         |         |
| $> 6$                           | 1 (9.1)                              | 5 (27.8)                          |         |
| CA-125 (median, range, U/ml)    | 10.3 (1.8, 104)                      | 8 (3.7, 27.0)                     | 0.52    |
| NLR (median, range)             | 2.15 (1.05, 41.03)                   | 2.04 (0.56, 7.16)                 | 0.94    |

FIGO, International Federation of Gynecology and Obstetrics; NLR, neutrophil to lymphocyte ratio.
